# Supplementary material for: LINC01798/miR-17-5p axis regulates ITGA8 and causes changes in tumor microenvironment and stemness in lung adenocarcinoma
Source: Research Square preprint supplement (doi:10.21203/rs.3.rs-1983303/v1), 2022-08-26
Supplement: Supplementary file 2 [file ffac32c31a84358e3e613bae.docx]

| miRNA | ITGA8_cor | pvalue |
| --- | --- | --- |
| hsa-miR-17-5p | -0.3028695 | 4.36E-12 |
| hsa-miR-93-5p | -0.2835785 | 9.95E-11 |
| hsa-miR-20a-5p | -0.202069 | 4.84E-06 |

**Supplementary table 1** Correlation analysis between the expression of miRNA and ITGA8
